# Supplementary material
Source: Springer Nature journal article supplement (https://www.springermedizin.de/resource/supplementary/12933_2008_144_MOESM3_ESM.pdf/9539692)

Bland-Altman Top (A) rest

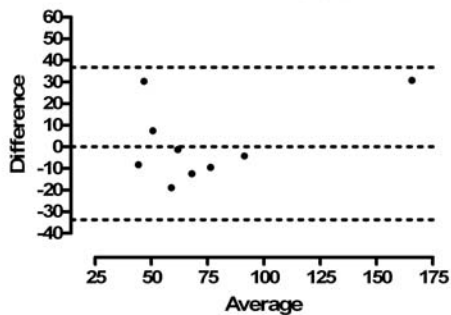

Bland-Altman Top (A) dipyridamole

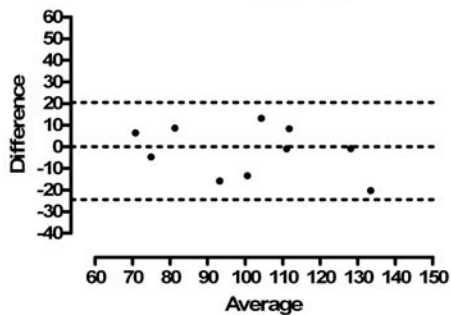

Bland-Altman Slope ( $\beta$ ) rest

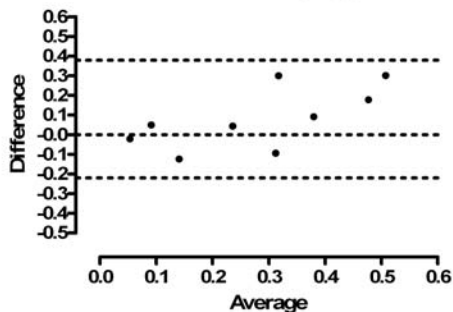

Bland-Altman Slope ( $\beta$ ) dipyridamole

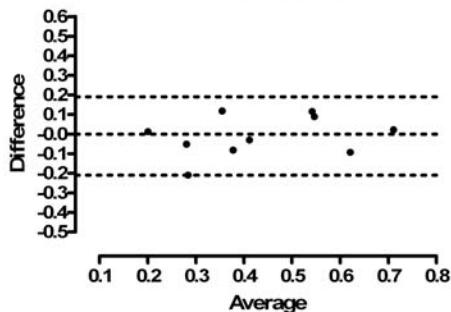

Supplement: MOESM3 [file 9539692]
